# Supplementary material for: Simultaneous improvement of martensitic phase transition and ductility in Cu-doped and/or alloyed all-d-metal Ni2MnTa Heusler compounds
Source: Royal Society of Chemistry journal article supplement (doi:10.1039/d3cp05787a), 2024-01-01
Supplement: d3cp05787a1.pdf [file d3cp05787a1.pdf]

## Simultaneous improvement of martensitic phase transition and ductility in Cu-doped and/or alloyed all-*d*-metal Ni<sub>2</sub>MnTa Heusler compounds

Guijiang Li<sup>1,\*</sup>, Lei Xu<sup>1</sup>, Zhenhua Cao<sup>1</sup>

<sup>1</sup>College of Materials Science and Engineering, Nanjing Tech University, Nanjing 211816, China

Supplementary materials

### A. The calculation details for elastic related parameters

The cubic all-*d*-metal Heusler compounds possess three independent elastic constants, i.e.,  $C_{11}$ ,  $C_{12}$ , and  $C_{44}$ . Among them, the  $C_{11}$  and  $C_{12}$  were obtained from the tetragonal shear modulus  $C' = (C_{11} - C_{12})/2$  and the bulk modulus  $B = (C_{11} + 2C_{12})/3$ <sup>1</sup>. Herein, the equilibrium volume and bulk modulus were determined by fitting the calculated total energy versus volume to a Morse function<sup>2</sup>. The tetragonal shear modulus  $C'$  and the cubic elastic modulus  $C_{44}$  were derived from the volume-conserving orthorhombic deformation and monoclinic deformation. By fitting the total energies with respect to adopted orthorhombic ( $\delta_o$ ) and monoclinic ( $\delta_m$ ) distortions as

$E(\delta_o) = E(0) + 2VC'\delta_o^2$  and  $E(\delta_m) = E(0) + 2VC_{44}\delta_m^2$ , both  $C'$  and  $C_{44}$  can be obtained. These methods

allow for the determination of the  $C_{11}$ ,  $C_{12}$  and  $C_{44}$ . The elastic moduli in this study are calculated by following Voigt–Reuss–Hill (VRH) approximation<sup>3-5</sup>. By Voigt and Reuss approximations, the bulk and shear moduli can be derived by  $B_V = B_R = \frac{C_{11} + 2C_{12}}{3}$ ,  $G_V = \frac{(C_{11} - C_{12} + 3C_{44})}{5}$  and

$G_R = \frac{5(C_{11} - C_{12})C_{44}}{4C_{44} + 3(C_{11} - C_{12})}$ . Then, average bulk and shear moduli ( $B_H = \frac{B_V + B_R}{2}$  and  $G_H = \frac{G_V + G_R}{2}$ )

was calculated by adopting the VRH approximation. Furthermore, Poisson's ratio was deduced

by  $\nu = \frac{3B - 2G}{2(3B + G)}$ <sup>1</sup>. The Debye temperature ( $\Theta_D$ ) can be obtained from the average sound velocity

based on the equation of  $\Theta_D = \frac{h}{k_B} \left[ \frac{3q}{4\pi} \frac{N_A \rho}{M} \right]^{1/3} v_m$ <sup>6</sup>. Herein,  $h$  and  $k_B$  are the Planck and Boltzmann constants,  $q$  is the number of atoms in each formula unit,  $N_A$  is the Avogadro's number,

---

\* Corresponding author (email: guijiangli@njtech.edu.cn)

M is the molecular weight per formula unit,  $\rho$  is the density.  $V_m$  ( $V_m = \left[ \frac{1}{3} \left( \frac{2}{v_l^3} + \frac{1}{v_t^3} \right) \right]^{-1/3}$ ) is the average velocity, where  $v_l$  ( $= \sqrt{\left( B + \frac{4}{3} G \right) \frac{1}{\rho}}$ ) and  $v_t$  ( $= \sqrt{\frac{G}{\rho}}$ ) are longitudinal and transverse sound velocities, respectively. The Cauchy's pressure in this study for all-d-metal Heusler compounds was defined by the Cauchy relation as  $C_{12} - C_{44}$ <sup>1</sup>.

### ***B. Atomic preferential occupation in Cu-doped and/or alloyed Ni<sub>2</sub>MnTa***

In L2<sub>1</sub>-type Ni<sub>2</sub>MnTa at ground state, the two Ni atoms occupy 8c sites. Ta and Mn atoms lie in 4a and 4b sites, respectively. To obtain the stable cubic structure, the preferential atomic occupation styles in Ni<sub>2-x</sub>Cu<sub>x</sub>MnTa, Ni<sub>2</sub>Mn<sub>1-x</sub>Cu<sub>x</sub>Ta, and Ni<sub>2</sub>MnTa<sub>1-x</sub>Cu<sub>x</sub> alloys were first investigated. For each of the three alloys series, five possible atomic occupation styles were considered herein. Considering Ni<sub>2-x</sub>Cu<sub>x</sub>MnTa as representative example, the considered atomic occupation styles are as follows: (I) the newly introduced Cu atoms directly occupy Ni sub-lattices, (II) Cu atoms occupy Mn sub-lattices and original Mn atoms are forced to move to Ni sub-lattices. (III) Cu atoms occupy Ta sub-lattices and original Ta atoms are forced to move to Ni sub-lattices. (IV) Cu atoms occupy Mn sub-lattices, original Mn atoms are forced to move to Ta sub-lattices, and Ta atoms then move to Ni sub-lattices. (V) Cu atoms occupy Ta sub-lattices, and original Ta atoms are forced to move to Mn sub-lattices, and Mn atoms then move to Ni sub-lattices. Based on above-mentioned atomic configurations in these series of alloys, the calculated energy listed in Table SI indicates that newly introduced Cu atoms prefer to direct atomic occupation style in Ni<sub>2-x</sub>Cu<sub>x</sub>MnTa, Ni<sub>2</sub>Mn<sub>1-x</sub>Cu<sub>x</sub>Ta, as described in style (I). For Ni<sub>2</sub>MnTa<sub>1-x</sub>Cu<sub>x</sub> alloys, the introduced Cu atoms prefer to occupy the Mn sub-lattice, and original Mn atoms are forced to move to Ta sub-lattices, as described in style (III). In Heusler alloys, the empirical atomic occupation rule indicates that transition metal atoms with more valence electrons prefer to occupy 8c sites. However, those with less valence electrons occupy 4a and/or 4b sites<sup>7</sup>. In Cu-doped and/or alloyed Ni<sub>2</sub>MnTa alloys, Cu atom possesses the most valence electrons. Thus, following this empirical atomic occupation rule, Cu atoms then preferentially occupy 8c sites. Theoretically, atomic occupation only in Ni<sub>2-x</sub>Cu<sub>x</sub>MnTa alloys agrees well with conventional rule. Atomic occupations in Ni<sub>2</sub>Mn<sub>1-x</sub>Cu<sub>x</sub>Ta and Ni<sub>2</sub>MnTa<sub>1-x</sub>Cu<sub>x</sub> alloys exhibit abnormal behaviors. Herein, atomic occupation styles in Ni<sub>2-x</sub>Cu<sub>x</sub>MnTa, Ni<sub>2</sub>Mn<sub>1-x</sub>Cu<sub>x</sub>Ta are same as the case in Cu-doped and/or alloyed Ni<sub>2</sub>MnGa<sup>8,9</sup>. In Heusler alloys, high-ordered atomic occupations are dominated by strong interatomic covalent hybridization strength<sup>10-12</sup>. When the covalent hybridization level decreases, abnormal atomic occupation can occur<sup>11</sup>. In Ni<sub>2</sub>Mn<sub>1-x</sub>Cu<sub>x</sub>Ta and Ni<sub>2</sub>MnTa<sub>1-x</sub>Cu<sub>x</sub> alloys, the abnormal atomic occupation indicates the weakening of the covalent hybridization strength dependence of Cu content. The preferential atomic occupation in Ni<sub>2-x</sub>Cu<sub>x</sub>MnTa alloys indicates that the covalent hybridization level remains at a higher level or decrease slightly. The

future experiments such as high-resolution neutron diffractions can help to identify the atomic occupation in  $\text{Ni}_2\text{Mn}_{1-x}\text{Cu}_x\text{Ta}$  and  $\text{Ni}_2\text{MnTa}_{1-x}\text{Cu}_x$  alloys.

Table SI. Different atomic occupation styles in Cu-doped and/or alloyed  $\text{Ni}_2\text{MnTa}$  alloys. Considering the energy of atomic occupation style I as reference, the relative energy difference ( $\Delta E$  in mRy) was obtained to determine the stable atomic occupation.

|                                                                | Composition                                                                                | Atomic occupation | $\Delta E$ |
|----------------------------------------------------------------|--------------------------------------------------------------------------------------------|-------------------|------------|
| $\text{Ni}_{2-x}\text{Cu}_x\text{MnTa}$<br>$x=0.1$             | I. $\text{Ni}_{2-x}\text{Cu}_x\text{MnTa}$                                                 | 0                 |            |
|                                                                | II. $(\text{Ni}_{2-x}\text{Mn}_x)(\text{Mn}_{1-x}\text{Cu}_x)\text{Ta}$                    | 1.30              |            |
|                                                                | III. $(\text{Ni}_{2-x}\text{Ta}_x)\text{Mn}(\text{Ta}_{1-x}\text{Cu}_x)$                   | 78.02             |            |
|                                                                | IV. $(\text{Ni}_{2-x}\text{Ta}_x)(\text{Mn}_{1-x}\text{Cu}_x)(\text{Ta}_{1-x}\text{Mn}_x)$ | 529.78            |            |
|                                                                | V. $(\text{Ni}_{2-x}\text{Mn}_x)(\text{Mn}_{1-x}\text{Ta}_x)(\text{Ta}_{1-x}\text{Cu}_x)$  | 32.36             |            |
| $\text{Ni}_2(\text{Mn}_{1-x}\text{Cu}_x)\text{Ta}$<br>$x=0.01$ | I. $\text{Ni}_2(\text{Mn}_{1-x}\text{Cu}_x)\text{Ta}$                                      | 0                 |            |
|                                                                | II. $(\text{Ni}_{2-x}\text{Cu}_x)(\text{Mn}_{1-x}\text{Ni}_x)\text{Ta}$                    | 0.38              |            |
|                                                                | III. $\text{Ni}_2(\text{Mn}_{1-x}\text{Ta}_x)(\text{Ta}_{1-x}\text{Cu}_x)$                 | 121.90            |            |
|                                                                | IV. $(\text{Ni}_{2-x}\text{Cu}_x)(\text{Mn}_{1-x}\text{Ta}_x)(\text{Ta}_{1-x}\text{Ni}_x)$ | 122.30            |            |
|                                                                | V. $(\text{Ni}_{2-x}\text{Ta}_x)(\text{Mn}_{1-x}\text{Ni}_x)(\text{Ta}_{1-x}\text{Cu}_x)$  | 152.62            |            |
| $\text{Ni}_2\text{Mn}(\text{Ta}_{1-x}\text{Cu}_x)$<br>$x=0.01$ | I. $\text{Ni}_2\text{Mn}(\text{Ta}_{1-x}\text{Cu}_x)$                                      | 0                 |            |
|                                                                | II. $(\text{Ni}_{2-x}\text{Cu}_x)\text{Mn}(\text{Ta}_{1-x}\text{Ni}_x)$                    | 0.38              |            |
|                                                                | III. $\text{Ni}_2(\text{Mn}_{1-x}\text{Cu}_x)(\text{Ta}_{1-x}\text{Mn}_x)$                 | -1.07             |            |
|                                                                | IV. $(\text{Ni}_{2-x}\text{Cu}_x)(\text{Mn}_{1-x}\text{Ni}_x)(\text{Ta}_{1-x}\text{Mn}_x)$ | -0.69             |            |
|                                                                | V. $(\text{Ni}_{2-x}\text{Mn}_x)(\text{Mn}_{1-x}\text{Cu}_x)(\text{Ta}_{1-x}\text{Ni}_x)$  | 0.50              |            |

### C. Lattice sizes in Cu-doped and/or alloyed $Ni_2MnTa$

Based on stable atomic occupation styles in  $Ni_{2-x}Cu_xMnTa$ ,  $Ni_2Mn_{1-x}Cu_xTa$ , and  $Ni_2MnTa_{1-x}Cu_x$  alloys, the lattice parameters of cubic phase were obtained by geometry optimization, as presented in Fig. S1. Theoretically, the lattice sizes of cubic phase in both  $Ni_{2-x}Cu_xMnTa$ ,  $Ni_2Mn_{1-x}Cu_xTa$ , and  $Ni_2MnTa_{1-x}Cu_x$  alloys all decreased with the doping of Ni, Mn and Ta atoms by Cu atoms. In Cu-doped and/or alloyed all-*d*-metal Heusler compounds  $Ni_2MnTa$ , the metallic bonding becomes prevalent, which is different from conventional p-d covalent hybridization dominated Ni-Mn-based Heusler compounds. Owing to the volume effect of metallic bonding, materials tend to crystallize in relatively close packed structures. The closer the arrangement of atoms, the lower the Coulomb energy and the more stable the binding. Thus, the increased metallic bonding in  $Ni_{2-x}Cu_xMnTa$ ,  $Ni_2Mn_{1-x}Cu_xTa$ , and  $Ni_2MnTa_{1-x}Cu_x$  alloys resulted in the contraction of lattice sizes.

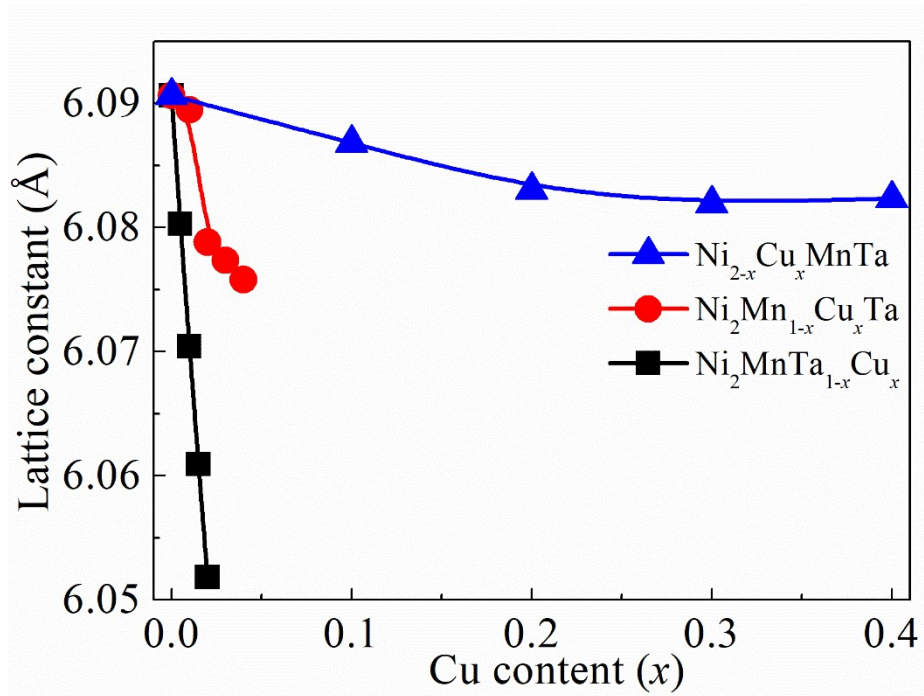

FIG. S1 Lattice parameters of (a)  $Ni_{2-x}Cu_xMnTa$ , (b)  $Ni_2Mn_{1-x}Cu_xTa$ , and (c)  $Ni_2MnTa_{1-x}Cu_x$  alloys.

### D. Magnetic moments in Cu-doped and/or alloyed Ni<sub>2</sub>MnTa

Based on theoretical atomic occupation styles and optimized lattice parameters, the magnetic moments were calculated in Cu-doped and/or alloyed Ni<sub>2</sub>MnTa and shown in Table SII.

Table SII. The calculated magnetic moments (in  $\mu_B$ /f.u.), as well as the calculated atomic magnetic moments (in  $\mu_B$ /atom) for Ni<sub>2-x</sub>Cu<sub>x</sub>MnTa, Ni<sub>2</sub>Mn<sub>1-x</sub>Cu<sub>x</sub>Ta, and Ni<sub>2</sub>MnTa<sub>1-x</sub>Cu<sub>x</sub> alloys with varying compositions.

| Composition                                                  | Ni(A,C) | Cu(A,C) | Mn(B) | Cu(B) | Ta(D)  | Mn(D) | Total |
|--------------------------------------------------------------|---------|---------|-------|-------|--------|-------|-------|
| Ni <sub>2</sub> MnTa                                         | 0.29    |         | 3.64  |       | -0.031 |       | 4.19  |
| Ni <sub>1.9</sub> Cu <sub>0.1</sub> MnTa                     | 0.29    | 0.030   | 3.62  |       | -0.035 |       | 4.15  |
| Ni <sub>1.8</sub> Cu <sub>0.2</sub> MnTa                     | 0.30    | 0.028   | 3.62  |       | -0.038 |       | 4.13  |
| Ni <sub>1.7</sub> Cu <sub>0.3</sub> MnTa                     | 0.31    | 0.026   | 3.61  |       | -0.040 |       | 4.11  |
| Ni <sub>1.6</sub> Cu <sub>0.4</sub> MnTa                     | 0.32    | 0.024   | 3.61  |       | -0.044 |       | 4.10  |
| Ni <sub>2</sub> Mn <sub>0.99</sub> Cu <sub>0.01</sub> T<br>a | 0.29    |         | 3.64  | 0.007 | -0.030 |       | 4.15  |
| Ni <sub>2</sub> Mn <sub>0.98</sub> Cu <sub>0.02</sub> T<br>a | 0.28    |         | 3.62  | 0.015 | -0.030 |       | 4.09  |
| Ni <sub>2</sub> Mn <sub>0.97</sub> Cu <sub>0.03</sub> T<br>a | 0.28    |         | 3.62  | 0.016 | -0.030 |       | 4.04  |
| Ni <sub>2</sub> Mn <sub>0.96</sub> Cu <sub>0.04</sub> T<br>a | 0.28    |         | 3.61  | 0.016 | -0.030 |       | 4.00  |
| Ni <sub>2</sub> MnTa <sub>0.99</sub> Cu <sub>0.0</sub><br>1  | 0.28    |         | 3.61  | 0.015 | -0.034 | -4.02 | 4.06  |
| Ni <sub>2</sub> MnTa <sub>0.98</sub> Cu <sub>0.0</sub><br>2  | 0.27    |         | 3.59  | 0.015 | -0.037 | -4.00 | 3.95  |
| Ni <sub>2</sub> MnTa <sub>0.97</sub> Cu <sub>0.0</sub><br>3  | 0.27    |         | 3.57  | 0.015 | -0.039 | -3.98 | 3.84  |
| Ni <sub>2</sub> MnTa <sub>0.96</sub> Cu <sub>0.0</sub><br>4  | 0.26    |         | 3.55  | 0.016 | -0.041 | -3.97 | 3.73  |

E. The electron density difference (EDD) distribution of Cu-doped and/or alloyed Ni<sub>2</sub>MnTa

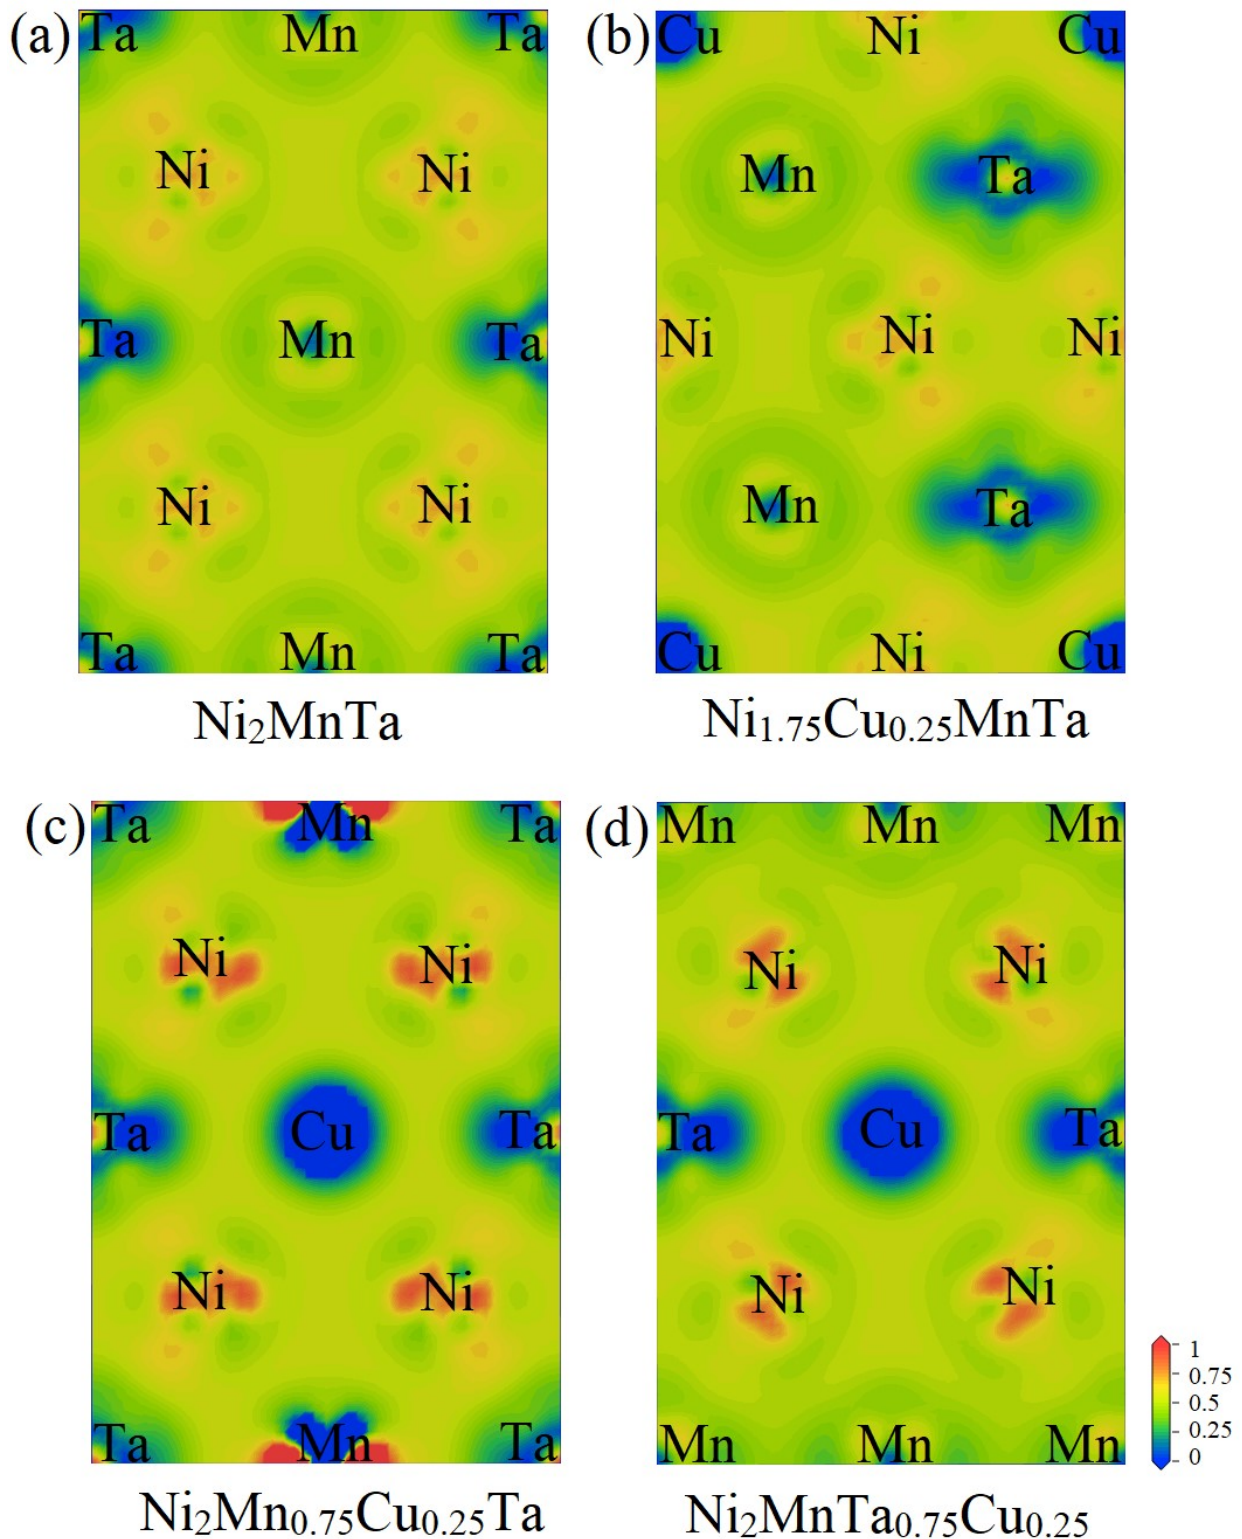

Fig. SII EDD maps for (a) Ni<sub>2</sub>MnTa, (b) Ni<sub>1.75</sub>Cu<sub>0.25</sub>MnTa, (c) Ni<sub>2</sub>Mn<sub>0.75</sub>Cu<sub>0.25</sub>Ta, and (d) Ni<sub>2</sub>MnTa<sub>0.75</sub>Cu<sub>0.25</sub> on (110) plane in cubic unit cells. On the lower right corner, there is a reference bar for EDD value. The comparison of these maps aids in revealing changes in interatomic hybridization.

## Reference

1. L. Vitos, *Computational Quantum Mechanics for Materials Engineers: The EMTO Method and Applications* (Springer-Verlag, London, 2007).
2. V. L. Moruzzi, J. F. Janak and K. Schwarz, *Phys. Rev. B*, 1988, **37**, 790-799.
3. A. Reuss, *Z. Ang. Math. Mech.*, 1929, **9**, 49-58.
4. R. Hill, *Proc. Phys. Soc. Sect. A*, 1952, **65**, 349-354.
5. W. Voigt, *Ann. Phys.*, 1889, **274**, 573-587.
6. O. L. Anderson, *J. Phys. Chem. Solids* 1963, **24**, 909-917.
7. T. J. Burch, T. Litrenta and J. I. Budnick, *Phys. Rev. Lett.*, 1974, **33**, 421-424.
8. A. Chakrabarti, M. Siewert, T. Roy, K. Mondal, A. Banerjee, M. E. Gruner and P. Entel, *Phys. Rev. B*, 2013, **88**, 174116.
9. C. M. Li, H. B. Luo, Q. M. Hu, R. Yang, B. Johansson and L. Vitos, *Phys. Rev. B*, 2011, **84**, 024206.
10. G. J. Li, E. K. Liu, H. G. Zhang, J. F. Qian, H. W. Zhang, J. L. Chen, W. H. Wang and G. H. Wu, *Appl. Phys. Lett.*, 2012, **101**, 102402-102404.
11. G. J. Li, E. K. Liu, H. G. Zhang, Y. J. Zhang, G. Z. Xu, H. Z. Luo, H. W. Zhang, W. H. Wang and G. H. Wu, *Appl. Phys. Lett.*, 2013, **102**, 062407.
12. G. J. Li, E. K. Liu, Y. J. Zhang, Y. Du, H. W. Zhang, W. H. Wang and G. H. Wu, *J. Appl. Phys.*, 2013, **113**, 103903.
